# Supplementary material
Source: MDPI journal article supplement (https://www.mdpi.com/2073-4344/9/6/525)
Supplement: s1 [file s1]

# Supplementary Materials: Ni-Mo Sulfide Semiconductor Catalyst with High Catalytic Activity for One-Step Conversion of CO<sub>2</sub> and H<sub>2</sub>S to Syngas in Non-Thermal Plasma

Xiaozhan Liu, Lu Zhao\*, Ying Li, Kegong Fang\* and Minghong Wu

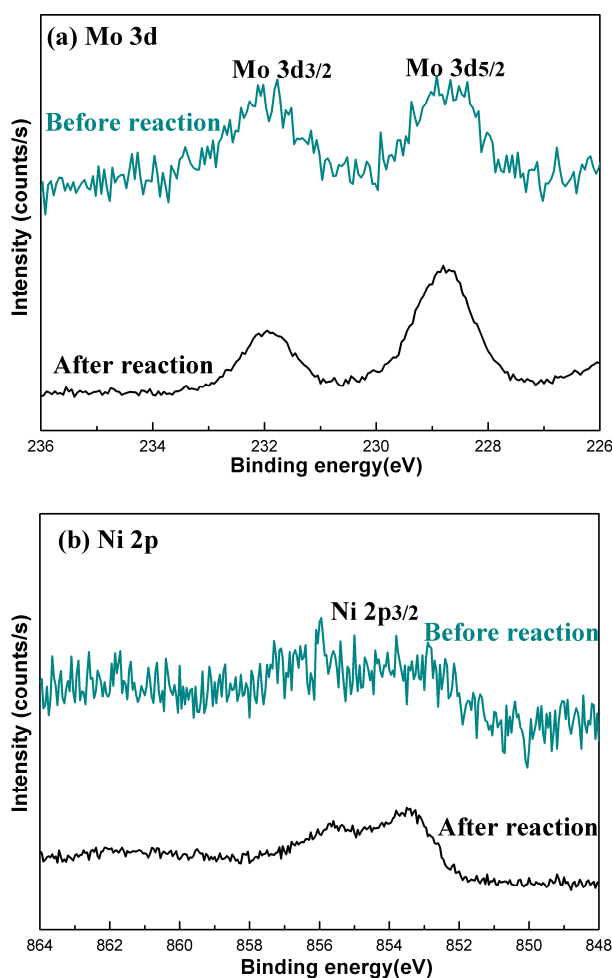

**Figure S1.** XPS spectra of Mo 3d (a) and Ni 2p (b) for the 5Ni-3Mo/Al<sub>2</sub>O<sub>3</sub> catalyst before and after reaction.

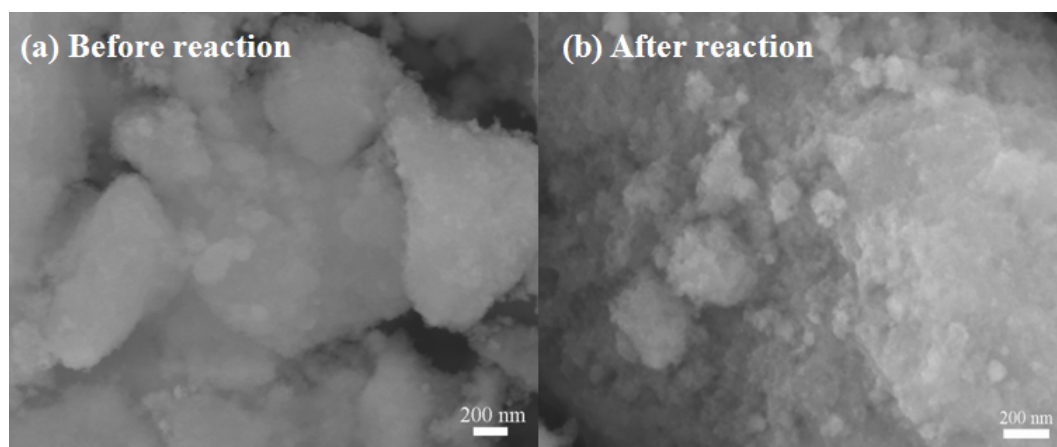

**Figure S2.** SEM images of the 5Ni-3Mo/Al<sub>2</sub>O<sub>3</sub> catalyst before (a) and after (b) reaction.

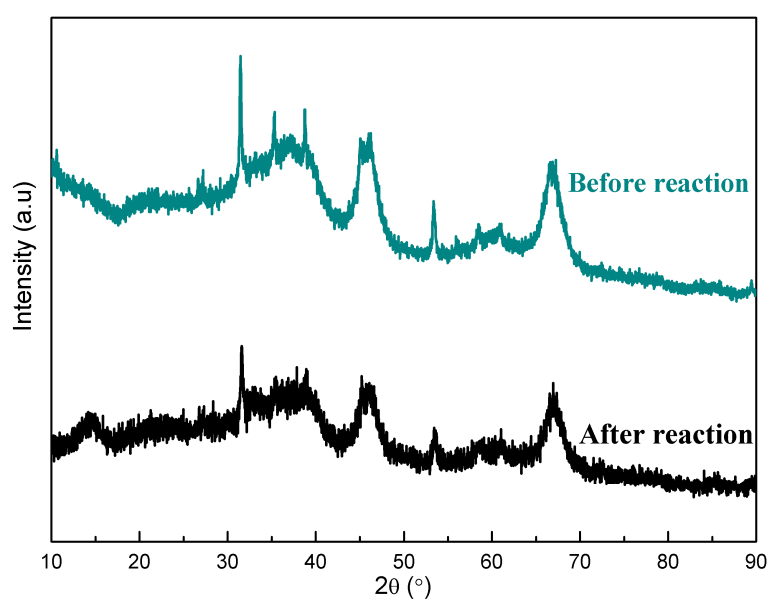

**Figure S3.** XRD patterns of the 5Ni-3Mo/Al<sub>2</sub>O<sub>3</sub> catalyst before and after reaction.
